# Supplementary material for: Graph Theory-Based Electroencephalographic Connectivity and Its Association with Ketogenic Diet Effectiveness in Epileptic Children
Source: MDPI journal article supplement (doi:10.3390/nu13072186), 2021-06-25
Supplement: s1 [file s1]

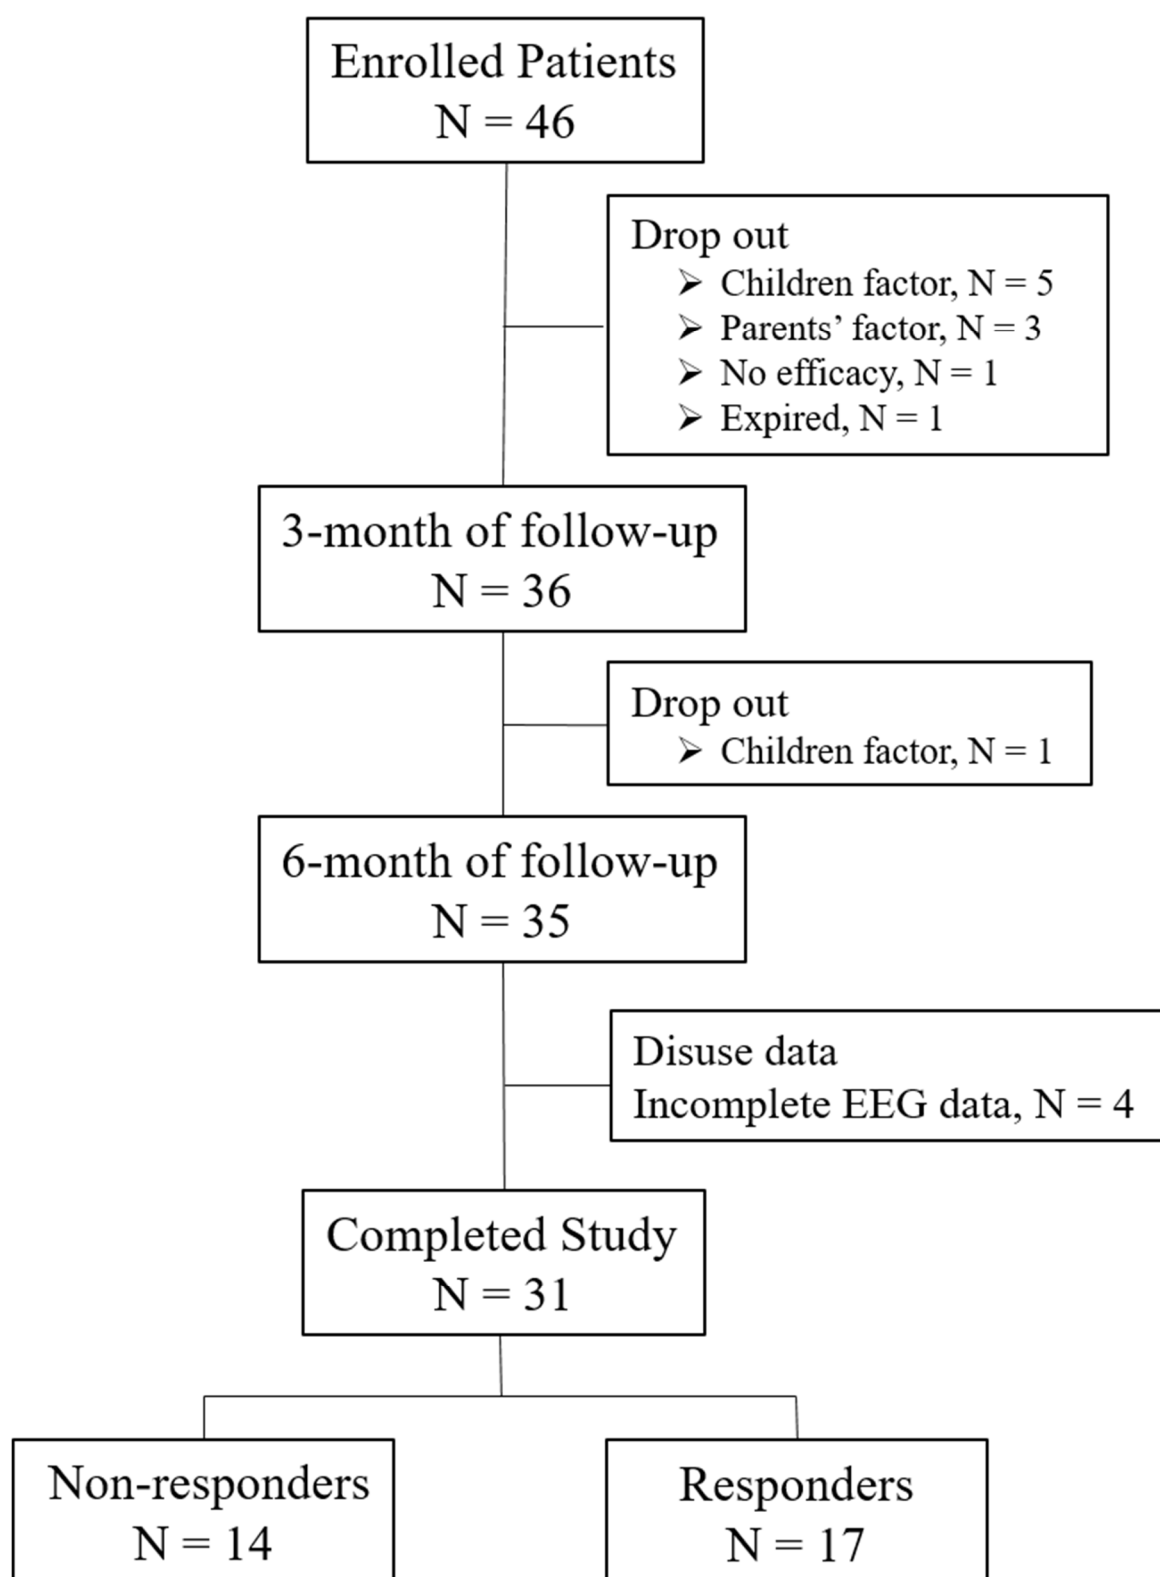

**Figure S1.** Flowchart of patient enrollment. We enrolled 46 subjects initially. Ten of them dropped out before 3-month follow-up, and one before 6-month follow-up due to children's factors, parents' factors, poor efficacy, or death. Four subjects were excluded for incomplete EEG data. Thirty-one subjects were finally included in this study, of whom 17 were KDT responders and 14 were non-responders.

**Table S1. Patients' document.** The clinical raw data of responders and non-responders were listed in this table. The six months seizure frequency means the average frequency during the first 6 months of ketogenic diet therapy. The six months seizure reduction rate (%) = (Baseline seizure frequency – six months seizure frequency) / Baseline seizure frequency x 100%. Responders were those who achieved a six months seizure reduction rate of 50% or more.

| Age<br>(Y; M) | Gender | Main Seizure type<br>(ILAE 2017)                                                                             | Etiology   | Baseline<br>Number<br>of AEDs | Baseline<br>Seizure<br>Frequency<br>(per<br>month) | Six<br>months<br>Seizure<br>Frequency<br>(per<br>month) | Six<br>months<br>Seizure<br>Reduction<br>rate (%) |
|---------------|--------|--------------------------------------------------------------------------------------------------------------|------------|-------------------------------|----------------------------------------------------|---------------------------------------------------------|---------------------------------------------------|
| 13; 6         | F      | Focal to bilateral tonic-clonic                                                                              | genetic    | 1                             | 1                                                  | 0                                                       | 100.00                                            |
| 0; 9          | M      | Generalized onset, Motor                                                                                     | HIE        | 2                             | 5                                                  | 0                                                       | 96.67                                             |
| 2; 4          | M      | Generalized onset, Motor                                                                                     | HIE        | 4                             | 476                                                | 145                                                     | 69.64                                             |
| 15; 4         | F      | 1. Focal onset, Impaired<br>awareness, Non-motor onset<br>2. Focal to bilateral tonic-clonic                 | unknown    | 4                             | 1                                                  | 0                                                       | 100.00                                            |
| 6; 10         | F      | Focal onset, Impaired<br>awareness, Non-motor onset                                                          | genetic    | 2                             | 15                                                 | 0                                                       | 98.89                                             |
| 2; 6          | M      | Generalized onset, Motor                                                                                     | HIE        | 3                             | 252                                                | 31                                                      | 87.63                                             |
| 10; 3         | M      | Focal to bilateral tonic-clonic                                                                              | unknown    | 3                             | 224                                                | 33                                                      | 85.12                                             |
| 3; 0          | M      | Generalized onset, Motor                                                                                     | genetic    | 3                             | 224                                                | 19                                                      | 91.59                                             |
| 1; 2          | M      | Generalized onset, Motor                                                                                     | structural | 3                             | 168                                                | 28                                                      | 83.23                                             |
| 2; 4          | F      | 1. Generalized onset, Motor<br>2. Focal to bilateral tonic-clonic                                            | genetic    | 2                             | 8                                                  | 4                                                       | 50.00                                             |
| 13; 10        | F      | Generalized onset, Motor                                                                                     | genetic    | 2                             | 4                                                  | 1                                                       | 75.00                                             |
| 0; 10         | F      | 1. Focal to bilateral tonic-clonic<br>2. Focal onset, Impaired<br>awareness, Non-motor onset                 | genetic    | 4                             | 3                                                  | 1                                                       | 77.78                                             |
| 4; 11         | F      | Generalized onset, Motor                                                                                     | unknown    | 3                             | 196                                                | 88                                                      | 55.10                                             |
| 15; 1         | F      | Focal to bilateral tonic-clonic                                                                              | unknown    | 2                             | 1                                                  | 0                                                       | 66.67                                             |
| 13; 10        | F      | Focal onset, Impaired<br>awareness, Non-motor onset                                                          | genetic    | 2                             | 6                                                  | 2                                                       | 72.22                                             |
| 4; 4          | M      | 1. Focal onset, Impaired<br>awareness, Non-motor onset<br>2. Focal onset, Impaired<br>awareness, Motor onset | unknown    | 2                             | 9                                                  | 2                                                       | 77.78                                             |
| 2; 11         | M      | Generalized onset, Motor                                                                                     | HIE        | 5                             | 168                                                | 0                                                       | 100.00                                            |
| 19; 1         | M      | Generalized onset, Motor                                                                                     | HIE        | 2                             | 1                                                  | 2                                                       | -83.33                                            |
| 14; 4         | M      | 1. Focal onset, Impaired<br>awareness, Motor onset<br>2. Focal to bilateral tonic-clonic                     | immune     | 3                             | 33                                                 | 19                                                      | 43.94                                             |
| 10; 10        | M      | Generalized onset, Motor                                                                                     | unknown    | 2                             | 1                                                  | 1                                                       | -33.33                                            |

|              |   |                                               |            |   |     |     |         |
|--------------|---|-----------------------------------------------|------------|---|-----|-----|---------|
| <b>13; 2</b> | F | Generalized onset, Motor                      | unknown    | 2 | 280 | 222 | 20.83   |
| <b>10; 0</b> | M | 1. Generalized onset,<br>Nonmotor             | genetic    | 2 | 32  | 18  | 44.79   |
|              |   | 2. Generalized onset, Motor                   |            |   |     |     |         |
|              |   | 3. Focal to bilateral tonic-clonic            |            |   |     |     |         |
| <b>1; 2</b>  | M | Generalized onset, Motor                      | genetic    | 2 | 70  | 37  | 46.90   |
| <b>0; 10</b> | F | 1. Focal onset, Impaired<br>awareness, Motor  | structural | 4 | 30  | 80  | -165.00 |
|              |   | 2. Focal to bilateral tonic-clonic            |            |   |     |     |         |
| <b>9; 7</b>  | F | Focal onset, Impaired<br>awareness, Non-motor | infectious | 3 | 1   | 2   | -116.67 |
| <b>10; 4</b> | F | Focal onset, Impaired<br>awareness, Non-motor | genetic    | 3 | 66  | 58  | 12.37   |
| <b>0; 3</b>  | F | Generalized onset, Motor                      | structural | 3 | 51  | 33  | 34.64   |
| <b>0; 3</b>  | F | Generalized onset, Motor                      | genetic    | 4 | 41  | 48  | -17.07  |
| <b>6; 0</b>  | M | Focal to bilateral tonic-clonic               | genetic    | 1 | 5   | 11  | -123.33 |
| <b>6; 1</b>  | F | Generalized onset, Motor                      | genetic    | 6 | 140 | 200 | -0.429  |
| <b>0; 9</b>  | M | Generalized onset, Motor                      | genetic    | 3 | 140 | 100 | 0.286   |

Y: year; M: month; F: Female; M: Male; ILAE: International League Against Epilepsy; AED: anti-epileptic drug; HIE: hypoxic ischemic encephalopathy.
